# Supplementary material
Source: PubMed Central journal article supplement (PMC3966113)
Supplement: NIHMS561927-supplement-Supplementary_Data.pdf [file NIHMS561927-supplement-Supplementary_Data.pdf]

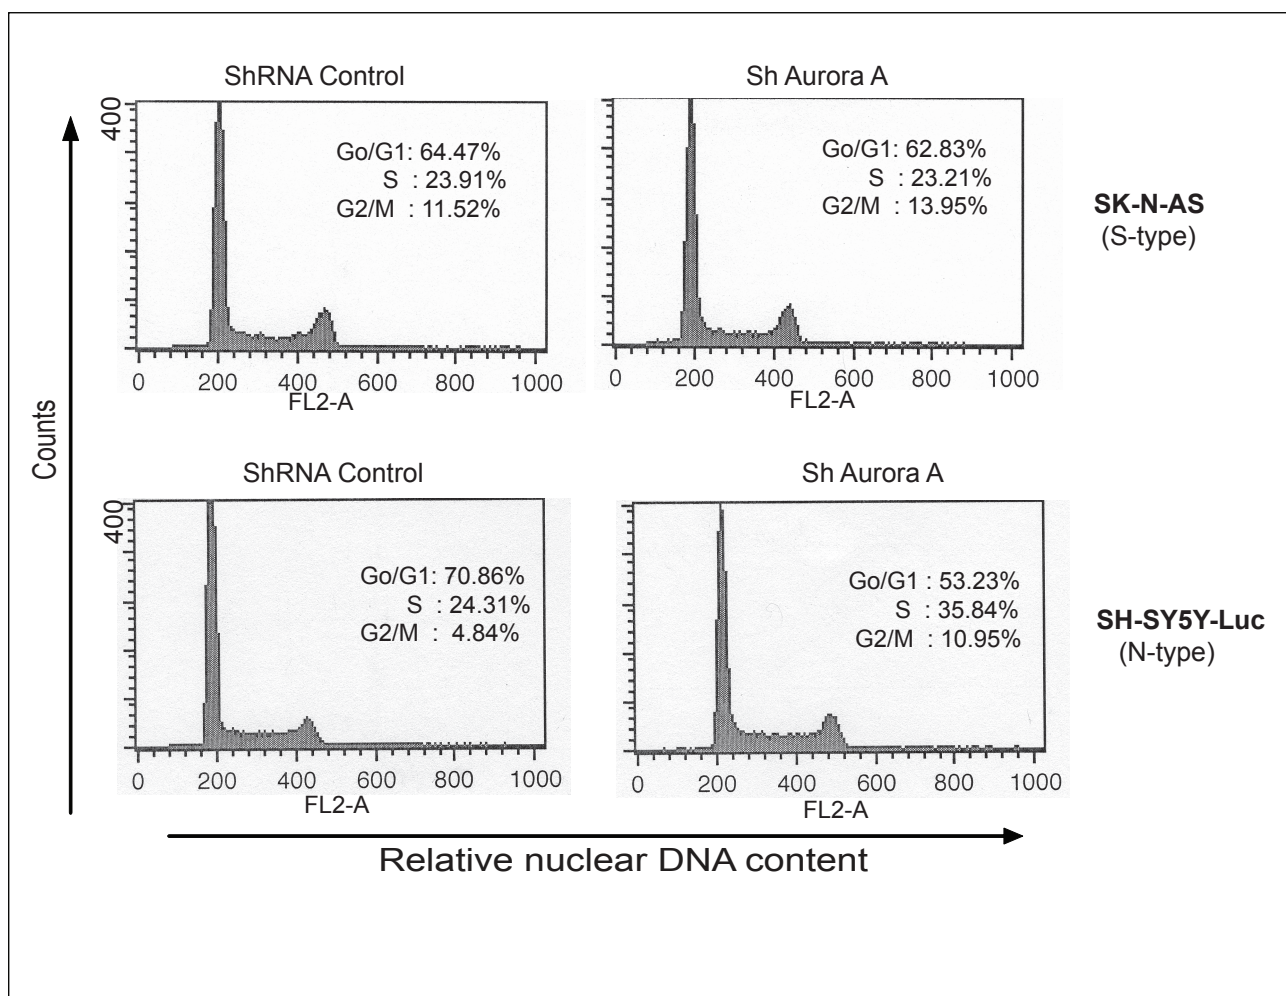

**Supplemental Table 1. Shang et al.**

**Table 1. Cox multivariable analysis for progression-free survival**

| <b>Variables*</b>     | <b>Number of Patient (%)</b> | <b>P value</b> | <b>Hazard Ratio</b> | <b>95% CI</b> |
|-----------------------|------------------------------|----------------|---------------------|---------------|
| <b>Aurora A mRNA</b>  |                              |                |                     |               |
| ≤ 3.25                | 40(64.5%)                    |                | 1                   |               |
| >3.25                 | 22(35.5%)                    | 0.006          | 4.8                 | 1.6 – 14.4    |
| <b>COG Risk Group</b> |                              |                |                     |               |
| Low-Intermediate      | 42(65.6%)                    |                | 1                   |               |
| High                  | 22(34.4%)                    | 0.03           | 3.1                 | 1.1 – 8.8     |

\*Final model included only statistically significant variables.
